# Supplementary material for: Taurine Inhibits Ferroptosis Mediated by the Crosstalk between Tumor Cells and Tumor‐Associated Macrophages in Prostate Cancer
Source: PubMed Central journal article supplement (PMC10797466; doi:10.1002/advs.202303894), 2023-11-29
Supplement: ADVS-11-2303894-s001.pdf [file ADVS-11-2303894-s001.pdf]

## Supporting Information

for *Adv. Sci.*, DOI 10.1002/adv.202303894

Taurine Inhibits Ferroptosis Mediated by the Crosstalk between Tumor Cells and  
Tumor-Associated Macrophages in Prostate Cancer

*Huixiang Xiao, Xinxing Du, Zhenkeke Tao, Nan Jing, Shijia Bao, Wei-Qiang Gao\*, Baijun Dong\*  
and Yu-Xiang Fang\**

# Supporting Information

## Taurine inhibits ferroptosis mediated by the crosstalk between tumor cells and tumor-associated macrophages in prostate cancer

Huixiang Xiao, Xinxing Du, Zhenkeke Tao, Nan jing, Shijia Bao, Wei-Qiang Gao\*, Baijun Dong\*, Yu-Xiang Fang\*

### Xiao et.al Fig S1

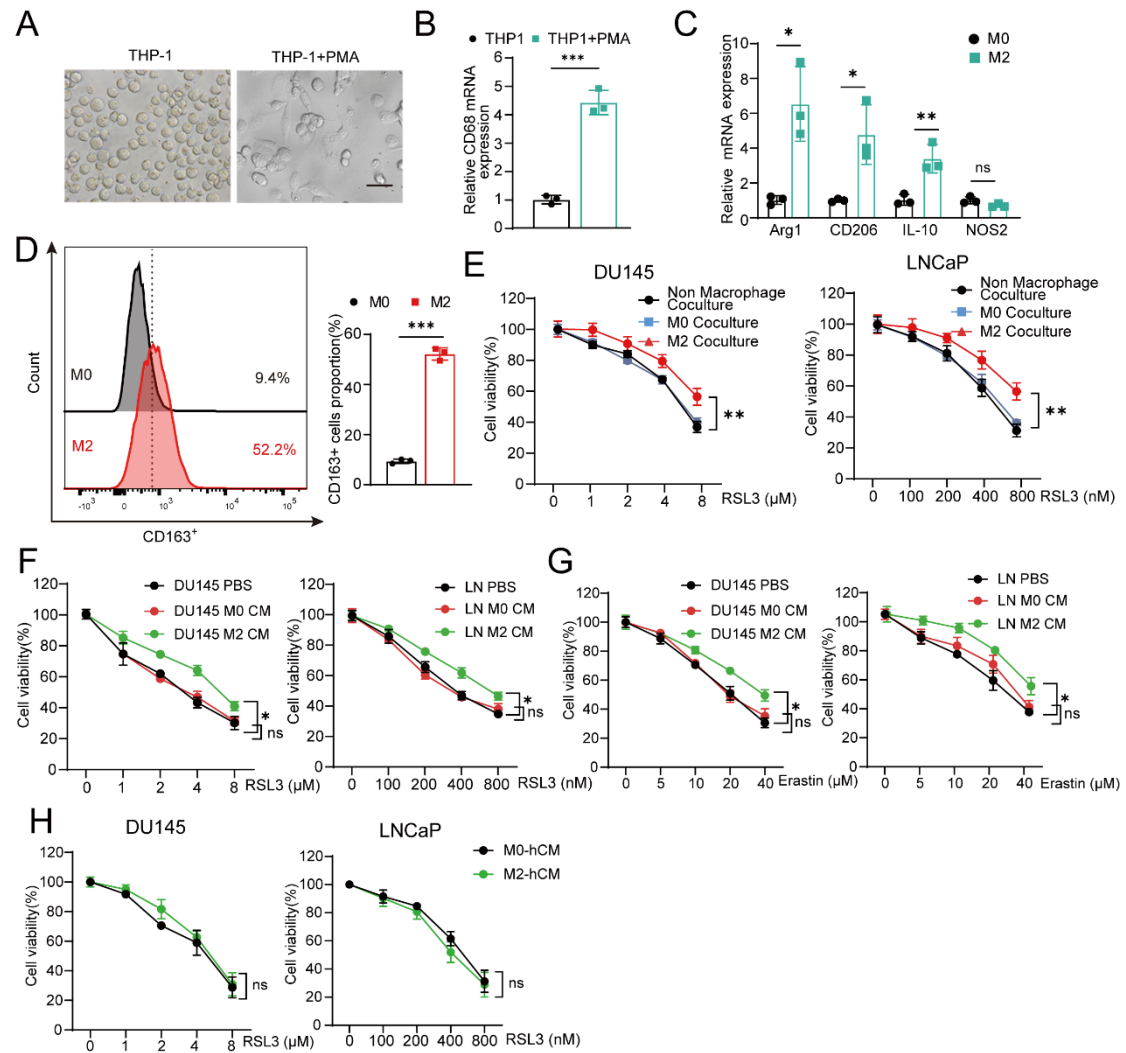

Figure S1. M2 macrophage supernatant possesses an inhibiting effect on ferroptosis in

PCa cells. (A) Representative image of THP-1 cells transformed macrophages after treatment with PMA for 24 h (scale bar= 50  $\mu$ M). (B) qPCR analysis of the expression of the macrophage marker CD68. (C, D) The expression of ARG1, CD206, IL-10, iNOS (C) and typical M2 marker CD163 (D) in M0/M2 macrophage. (E) Cell viability of PCa cells with or without macrophages co-culture for 24h, followed by treatment with RSL3 for an additional 24h. (F, G) Analysis of cell viability of PCa cells after incubated with M0 CM or M2 CM for 24h following with the RSL3 (F) or Erastin (G) treatment for another 24h. (H) Analysis of cell viability of PCa cells after incubated with M0-hCM or M2-hCM (high molecular weight components conditional medium) for 24h following with the RSL3 treatment for 24h. Each experiment was performed in triplicate and independently repeated three times. (Two-tailed Student's t-test was used for the statistical analysis: ns, not significant; \*,  $p < 0.05$ ; \*\*,  $p < 0.01$ ; \*\*\*,  $p < 0.001$ . Data are presented as means  $\pm$  SD,  $n=3$ )

## Xiao et.al Fig S2

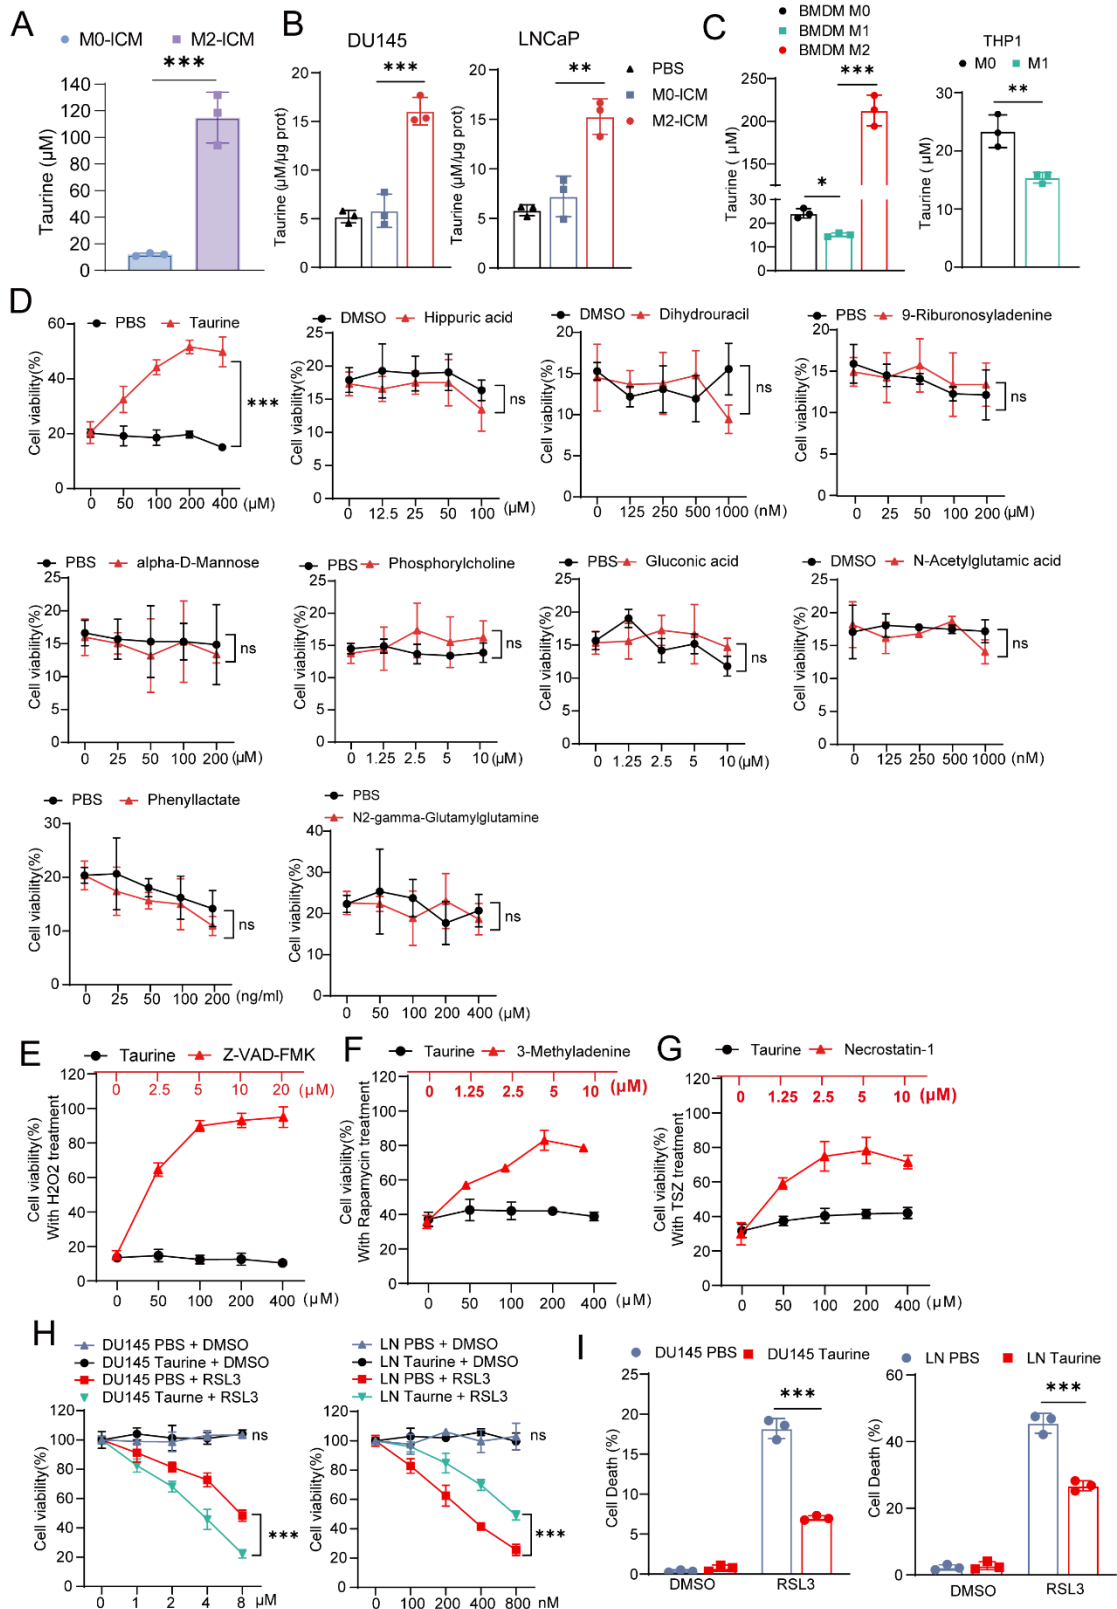

Figure S2. M2 macrophages secreted taurine to inhibit ferroptosis. (A) The taurine level in M0-ICM and M2-ICM. (B) Taurine level in PCa cells after incubated with

M0-ICM or M2-ICM for 24h. (C) The taurine content in BMDM derived M0, M1 or M2 macrophages and in THP1-derived M0 or M1 macrophages. (D) Cell viability of DU145 cells treated with each metabolite in a series of concentration gradients for 24h followed by RSL3 treatment (8  $\mu$ M) for 24 hours. (E) Cell viability of DU145 cells treated with H<sub>2</sub>O<sub>2</sub> (300  $\mu$ M) followed with in a series of concentration gradients taurine or Z-VAD-FMK (apoptosis inhibitor, as a positive-control). (F) Cell viability of DU145 cells treated with rapamycin (500 nM) followed with in a series of concentration gradients taurine or 3-methyladenine (autophagy inhibitor, as a positive-control). (G) Cell viability of DU145 cells treated with TSZ (20 ng/ml TNF + 0.2  $\mu$ M SM-164 + 20  $\mu$ M Z-VAD-FMK, necroptosis inducer) followed with in a series of concentration gradients taurine or necrostatin-1 (necroptosis inhibitor, as a positive-control). (H) Cell viability of PCa cells treated with or without taurine, followed by the treatment with DMSO or with RSL3 for 24h. (I) The cell death of PCa cells treated with PBS or taurine, followed with DMSO or with RSL3 (4  $\mu$ M for DU145 cells and 400 nM for LNCaP cells) treatment for 24h. Each experiment was repeated independently three times, and each treatment was replicated three times. (Two-tailed Student's t-test was used for the statistical analysis: ns, not significant; \*,  $p < 0.05$ ; \*\*,  $p < 0.01$ ; \*\*\*,  $p < 0.001$ . Data are presented as means  $\pm$  SD, n=3)

## Xiao et.al Fig S3

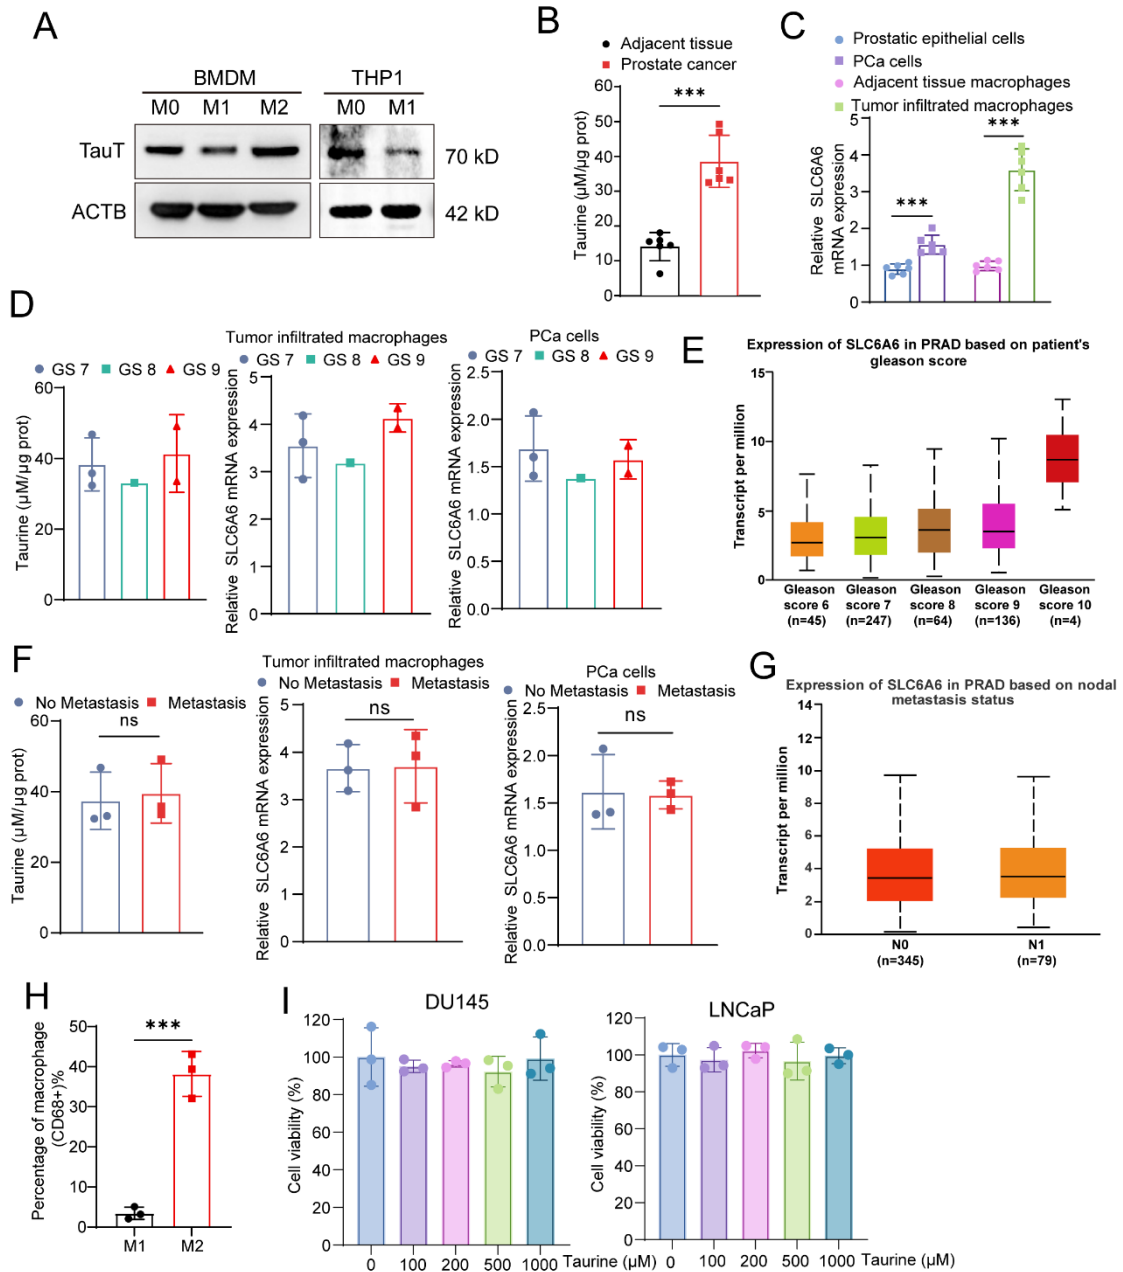

Figure S3. Elevated expression of TauT in M2 macrophages increases export of taurine. (A) The protein expression of TauT in BMDM derived M0, M1 or M2 macrophages and in THP1 derived M0 or M1 macrophages. (B) Taurine level in PCa patient derived cancer tissue and adjacent normal tissue (n=6). (C) The SLC6A6 expression was significantly upregulated in both tumor-infiltrated macrophages and tumor cells in PCa tumor tissues (n=6). (D) Taurine content and TauT expression in

macrophages or tumor cells have no significant difference among tumor tissues with variant Gleason Scores. (E) Analysis of the TauT expression in tumor samples with variant Gleason Scores in the TCGA PRAD database. (F) Taurine content and TauT expression in macrophages or tumor cells have no significant difference among tumor tissues with or without metastasis. (G) Analysis of the TauT expression in tumor samples with or without metastasis in the TCGA PRAD database. (H) The percentage of M1 and M2 macrophages in PCa tissue samples. (I) Cell viability of PCa cells after treated with taurine for 72h in variant concentration. Each experiment was performed in triplicate and independently repeated three times. (Two-tailed Student's t-test was used for the statistical analysis: \*\*,  $p < 0.01$ ; \*\*\*,  $p < 0.001$ . Data are presented as means  $\pm$  SD, n=3)

# Xiao et.al Fig S4

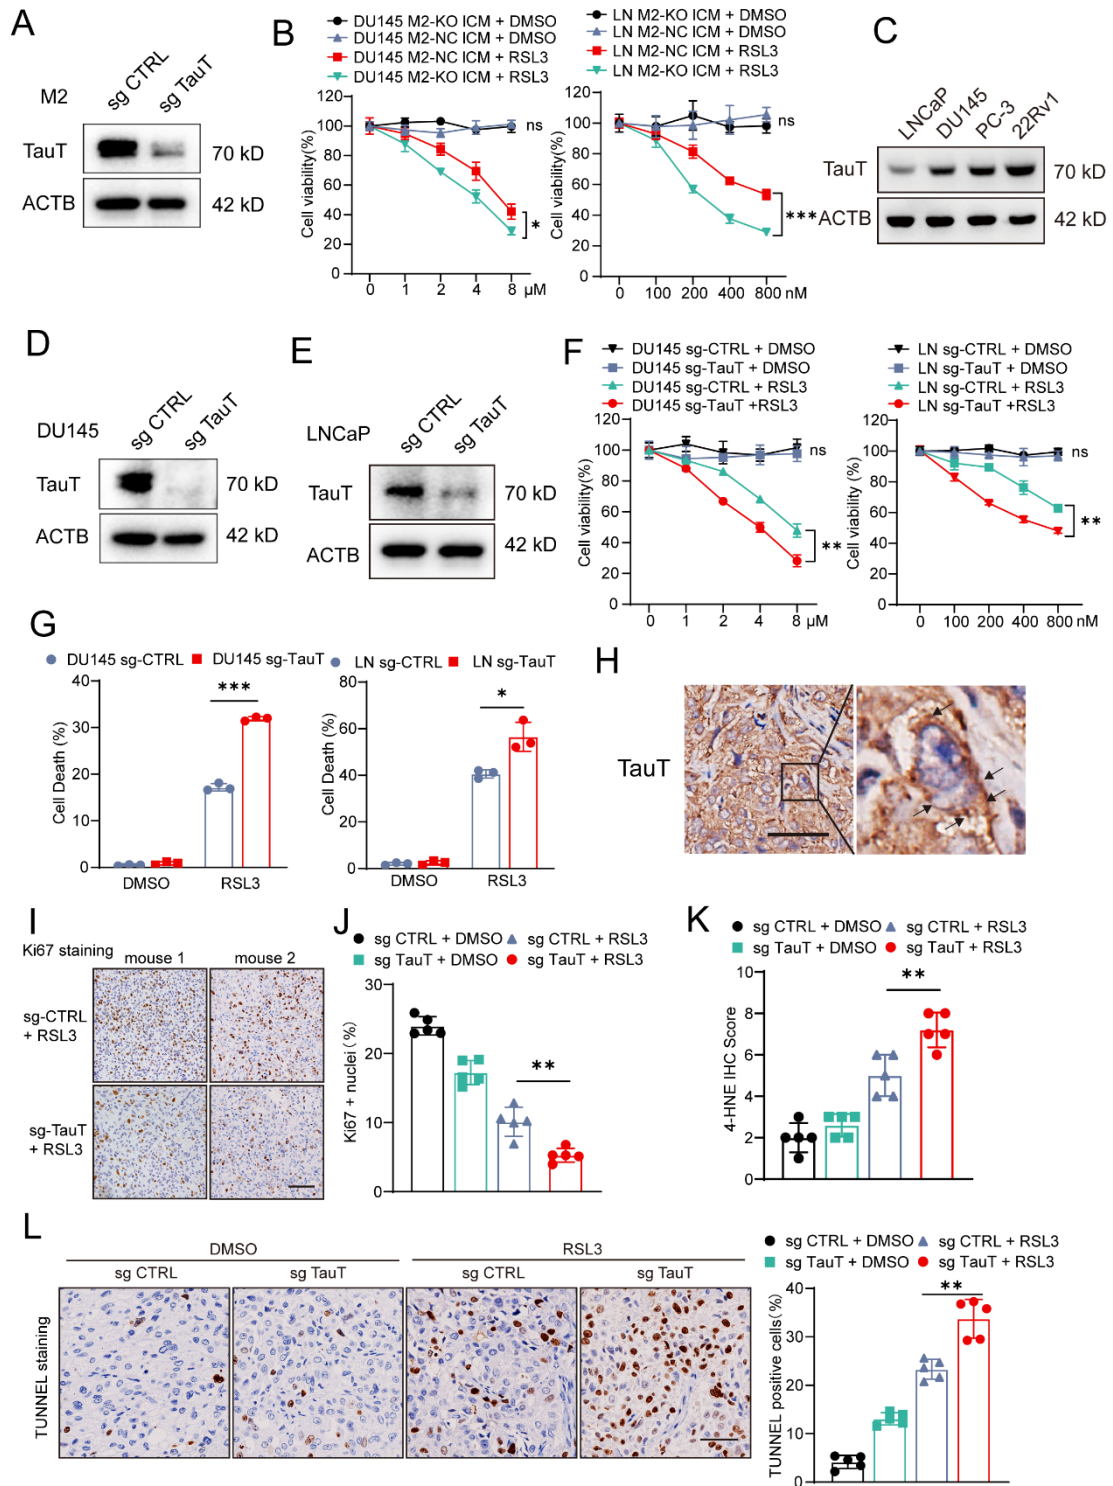

Figure S4. Knock out TauT promotes ferroptosis in PCa cells. (A) Confirmation of the TauT expression in M2 macrophages after TauT knockout. (B) Cell viability of PCa cells treated with M2-KO ICM or M2-NC ICM, followed by the treatment with DMSO or with RSL3 for 24h. (C) The endogenous TauT expression in LNCaP,



DU145, PC3 and 22Rv1 cells. (D, E) Confirmation of the TauT expression DU145 cells, and LNCaP cells after TauT knockout. (F) Cell viability of Taut KO or CTRL PCa cells treated with taurine (100  $\mu$ M), followed by the treatment with DMSO or with RSL3 for 24h. (G) The cell death of Taut KO or CTRL PCa cells treated with taurine (100  $\mu$ M), followed with DMSO or with RSL3 (4  $\mu$ M for DU145 cells and 400 nM for LNCaP cells). (H) Representative IHC images of the subcellular location of the TauT. (Scale bar = 50  $\mu$ M). (I) Representative IHC images of Ki67 staining of sg-CTRL + RSL3 group and sg-TauT + RSL3 group described in Figure 3I. (Scale bar = 100  $\mu$ M) (J) The calculation of Ki67 + nuclei in relevant groups described in Figure 3I. (K) The 4-HNE score in relevant groups described in Figure 3I. (L) Representative IHC images of Tunnel staining and the calculation of Tunnel positive cells in relevant groups described in Figure 3I. (Scale bar = 50  $\mu$ M). Each experiment was performed in triplicate and independently repeated three times. (Two-tailed Student's t-test was used for the statistical analysis: \*\*,  $p < 0.01$ ; \*\*\*,  $p < 0.001$ . Data are presented as means  $\pm$  SD,  $n=3$ )

## Xiao et.al Fig S5

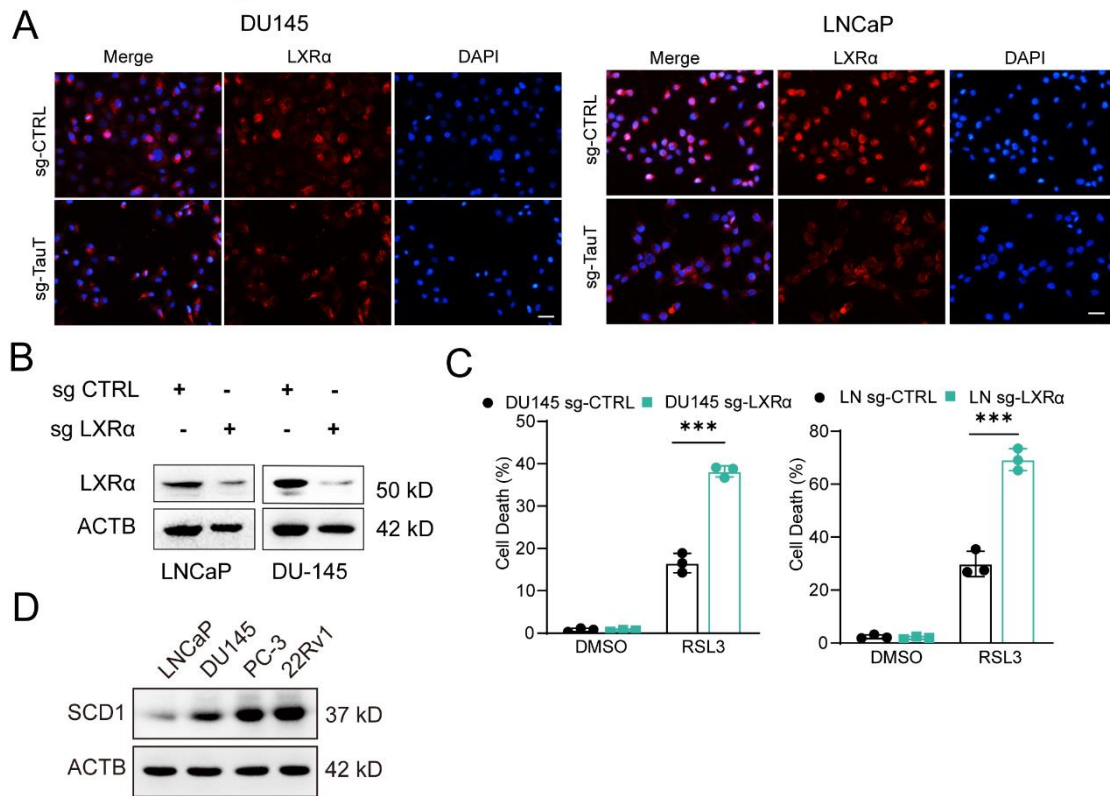

Figure S5. Taurine promotes LXR $\alpha$  nuclear translocation for anti-ferroptosis. (A) IF staining of LXR $\alpha$  in PCa cells with or without TauT knockout. (Scale bar = 50 Mm). (B) The protein expression of LXR $\alpha$  in LNCaP and DU145 cells after LXR $\alpha$  knockout. (C) The cell death of LXR $\alpha$  KO or CTRL PCa cells treated with taurine (100  $\mu$ M), followed with DMSO or with RSL3 (4  $\mu$ M for DU145 cells and 400 nM for LNCaP cells). (D) The endogenous SCD1 expression in LNCaP, DU145, PC3 and 22Rv1 cells. Each experiment was performed in triplicate and independently repeated three times. (Two-tailed Student's t-test was used for the statistical analysis: \*\*,  $p < 0.01$ ; \*\*\*,  $p < 0.001$ . Data are presented as means  $\pm$  SD,  $n=3$ )

## Xiao et.al Fig S6

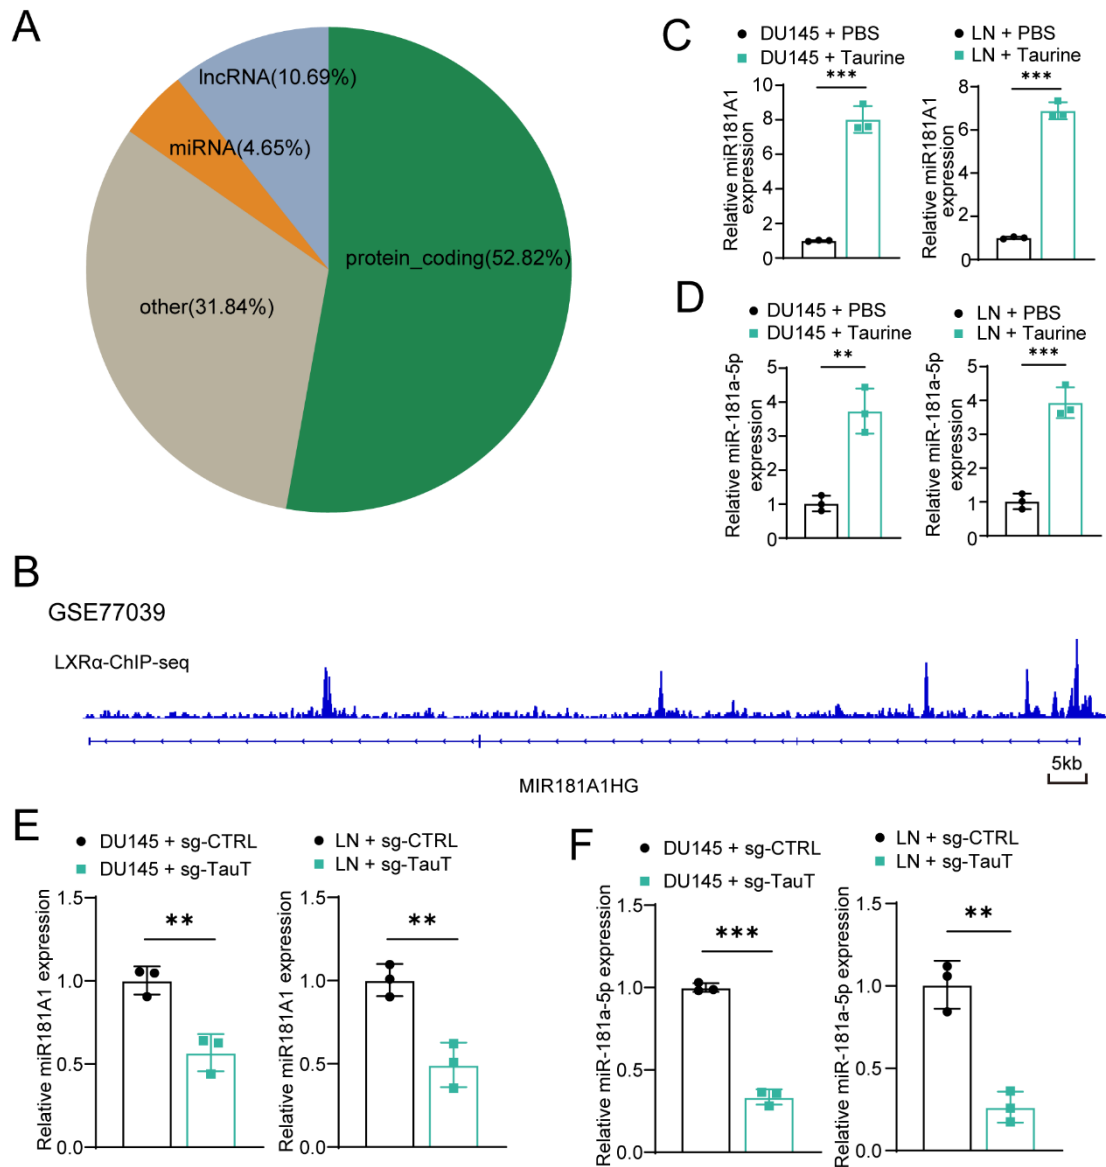

Figure S6. miR-181a-5p was a potential target of LXR $\alpha$ . (A) Pie chart showing the proportion of gene types potentially regulated by LXR $\alpha$ , based on the analysis of GSE77039 dataset. (B) Prediction of miR-181a-5p as a potential target of LXR $\alpha$  by ChIP-seq data analysis using dataset from GSE77039. (Scale bar = 5 kb). (C, D) The expression of miR-181A1 (C) and miR-181a-5p (D) in PCa cells treated with or with taurine. (E, F) The expression of miR-181A1 (E) and miR-181a-5p (F) in TauT KO or CTRL PCa cells with treatment of taurine (100  $\mu$ M). Each experiment was performed in triplicate and independently repeated three times. (Two-tailed Student's t-test was

used for the statistical analysis: \*\*,  $p < 0.01$ ; \*\*\*,  $p < 0.001$ . Data are presented as means  $\pm$  SD,  $n=3$ )

### Xiao et.al Fig S7

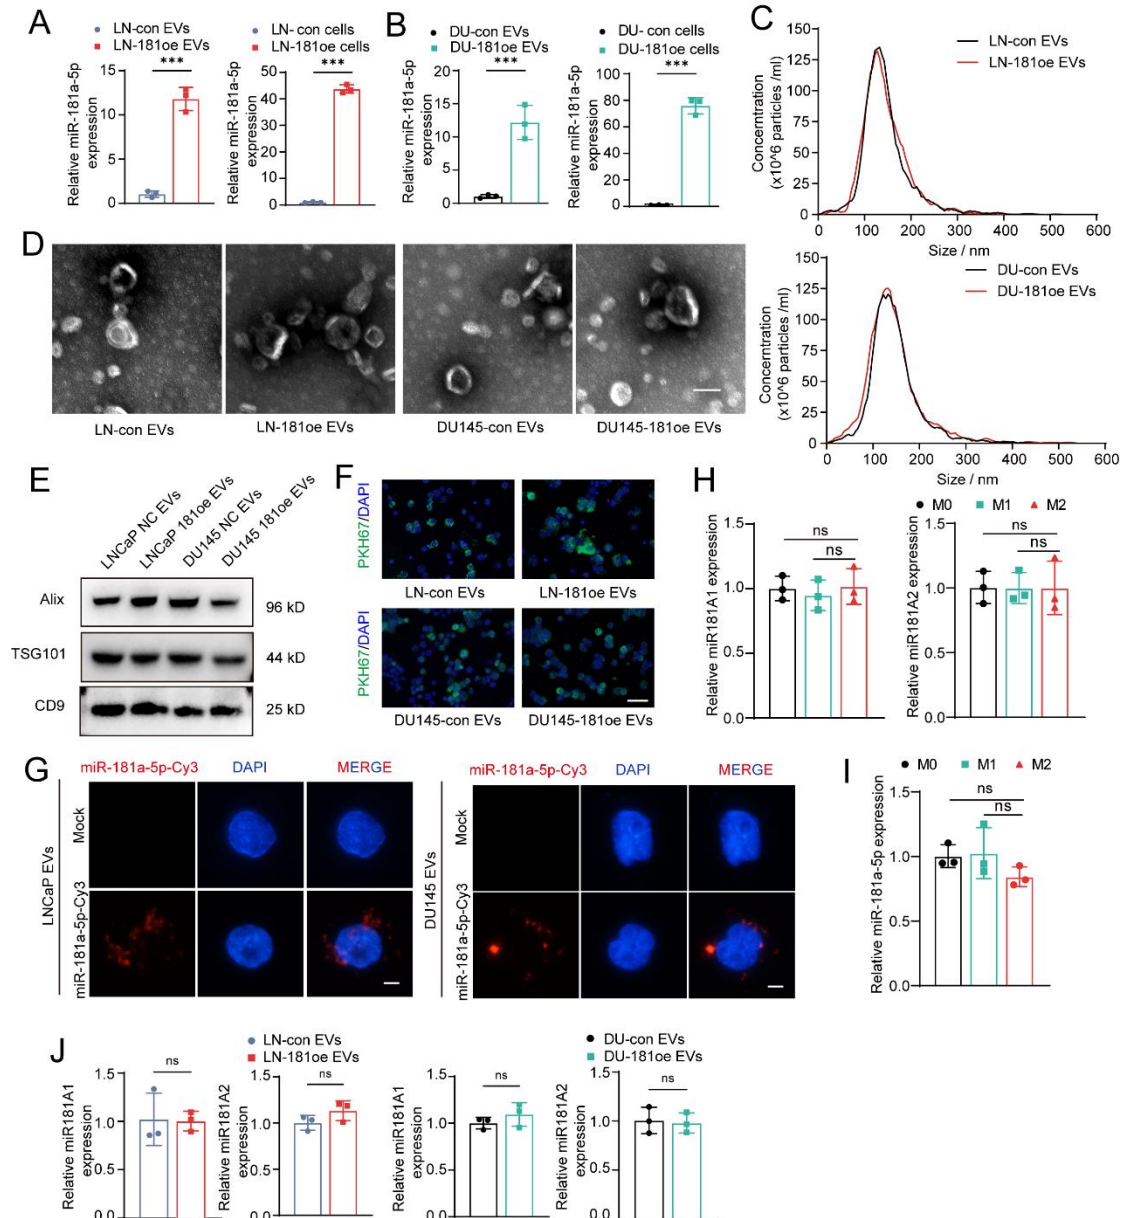

Figure S7. The characteristics of EVs are similar between con-EVs and 181-oe EVs. (A, B) The EV and intracellular expression of mature miR-181a-5p in LNCaP (A) and DU145 (B) cells after stable overexpression of miR-181a-5p. (C, D) Character analysis of relevant EVs by using NanoSight nanoparticle tracking analysis (C) and electron microscopy (D) (Scale bar = 100 nm). (E) The expression of EV markers

CD9, Alix, and Tsg101 in relevant EVs. (F) PKH67-staining (green) tracing assay for detection of the intake of relevant EVs in macrophages (Scale bar = 20  $\mu$ M). (G) Representative image of miR-181a-5p tracing in macrophages. (scale bar = 5  $\mu$ M). (H, I) The expression of both miR-181A1 and miR-181A2 (H), and miR-181a-5p (I) in THP1 derived M0, M1 or M2 macrophages. (J) The expression of both miR181A1 and miR181A2 in macrophages after intake of DU-181oe EVs vs. DU-con EVs or LN-181oe EVs vs. LN-con EVs. Each experiment was performed in triplicate and independently repeated three times. (Two-tailed Student's t-test was used for the statistical analysis: ns, not significant; \*\*\*,  $p < 0.001$ . Data are presented as means  $\pm$  SD,  $n = 3$ )

### Xiao et.al Fig S8

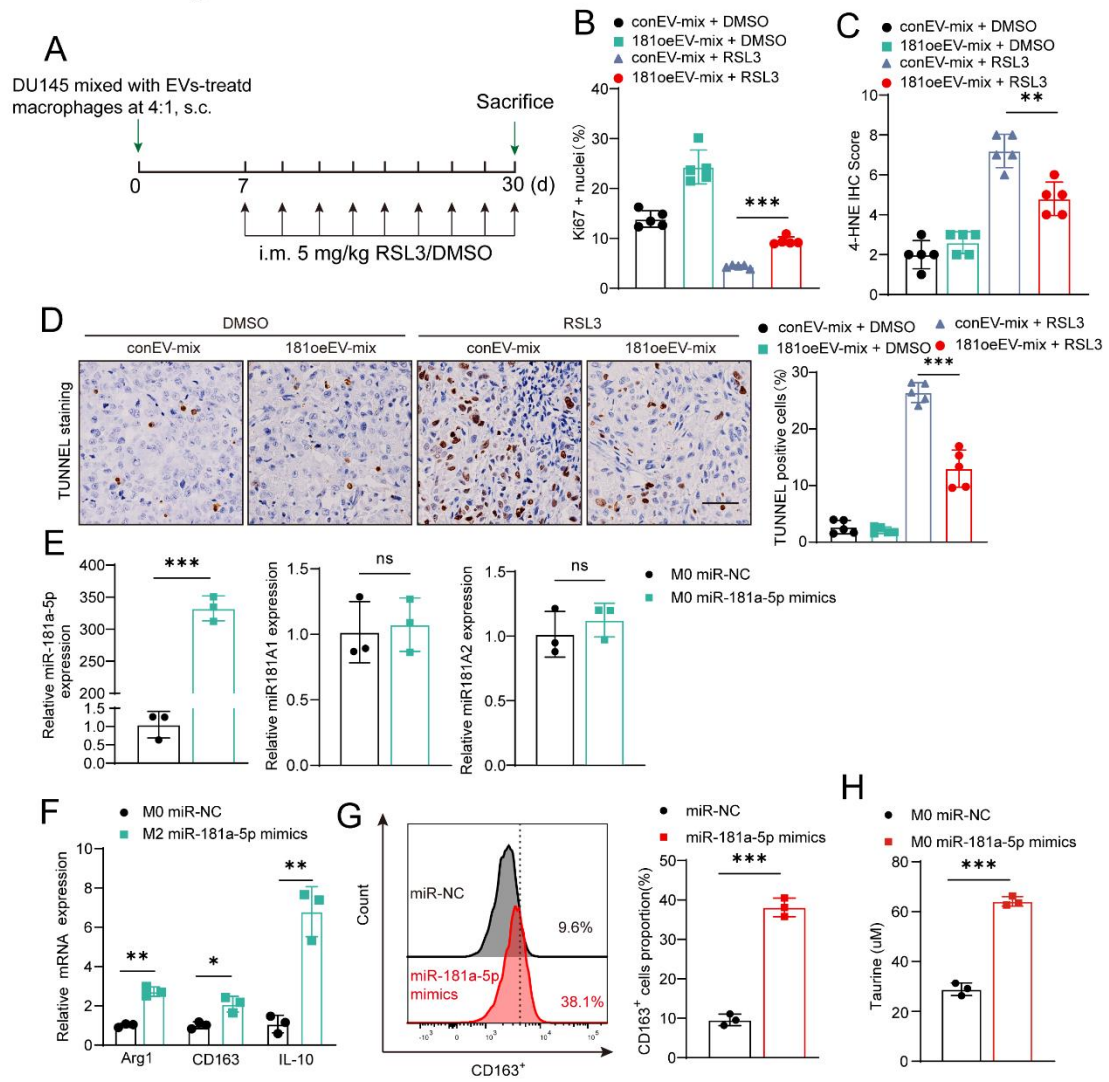

Figure S8. Direct overexpression of mir-181-5p in macrophages promotes M2 polarization. (A) Schematic illustration of experimental design about anti-ferroptosis evaluation in vivo. DU145 cells were mixed with macrophages (tumor cells : macrophages = 4:1) which were pre-treated with DU145-con EVs or DU145-181oe EVs to inject subcutaneously into nude mice. (B) The calculation of Ki67 + nuclei in relevant groups described in Figure 6G. (C) The 4-HNE score in relevant groups described in Figure 6G. (D) Representative IHC images of Tunnel staining and the calculation of Tunnel positive cells in relevant groups described in Figure 6G. (Scale bar = 50  $\mu$ M). (E) The expression of miR-181a-5p, miR181A1 and miR181A2 in M0 macrophage after overexpression of miR-181a-5p mimics. (F, G) qRT-PCR assay (F) and flow cytometry analysis (G) for expression of typical M2 markers in macrophages after overexpression of miR-181a-5p mimics. (H) taurine level of M0 macrophages after overexpression of miR-181a-5p mimics. Each experiment was performed in triplicate and independently repeated three times. (Two-tailed Student's t-test was used for the statistical analysis: ns, not significant; \*,  $p < 0.05$ ; \*\*,  $p < 0.01$ ; \*\*\*,  $p < 0.001$ . Data are presented as means  $\pm$  SD,  $n=3$ )

# Xiao et.al Fig S9

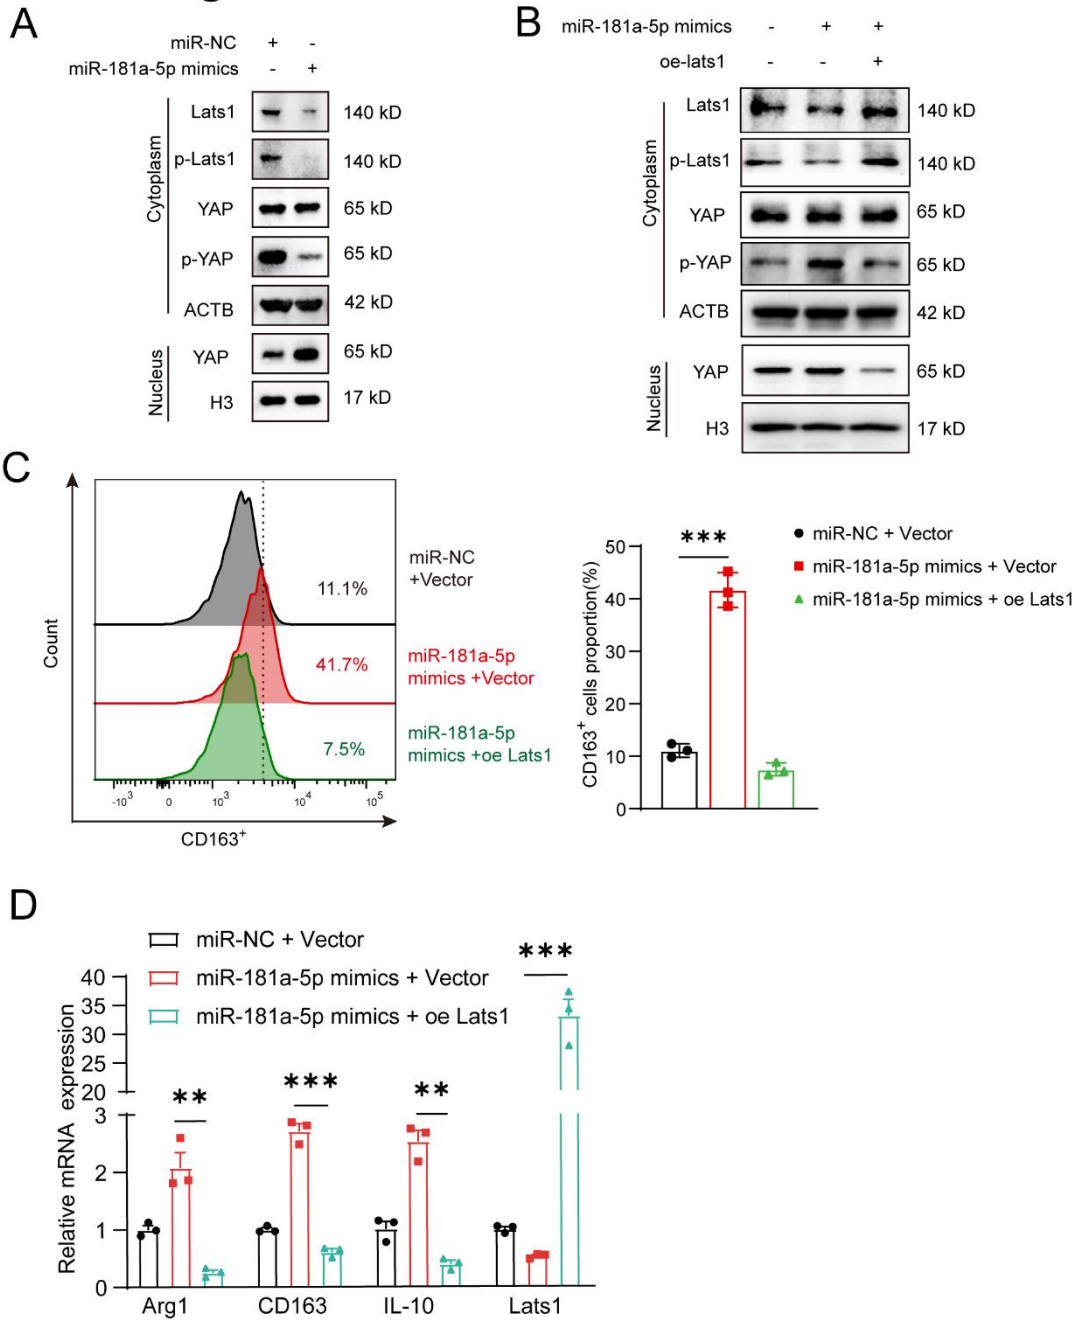

Figure S9. MiR-181a-5p inhibits the Hippo pathway via targeting Lats1. (A) The expression of Hippo pathway and its downstream YAP in M0 macrophages after overexpression of miR-181a-5p mimic vs. miR-NC mimic. (B) The expression of Hippo pathway and its downstream YAP in miR-181a-5p mimic overexpressed M0 macrophages after further overexpression of lats1 CDS as a rescue assay. (C) Typical image by flow cytometry analysis and check of CD163+ cells proportion in miR-181a-5p mimic overexpressed M0 macrophages after further overexpression of

lats1 CDS as a rescue assay. (D) The expression of M2 macrophage markers in miR-181a-5p mimic overexpressed M0 macrophages after further overexpression of lats1 CDS as a rescue assay. Each experiment was performed in triplicate and independently repeated three times. (Two-tailed Student's t-test was used for the statistical analysis: \*\*, p<0.01; \*\*\*, p<0.001. Data are presented as means  $\pm$  SD, n=3)

Table S1 Top 10 differential metabolite identified by non-target metabolomics

| Metabolites                             | log <sub>2</sub> (FC_M2/M0) | p-value |
|-----------------------------------------|-----------------------------|---------|
| Hippuric acid                           | 6.912                       | 0.005   |
| N <sup>2</sup> -gamma-Glutamylglutamine | 4.709                       | 0.001   |
| 9-Riburonosyladenine                    | 3.704                       | 0.001   |
| Taurine                                 | 2.448                       | 0.001   |
| N-Acetylglutamic acid                   | 1.993                       | 0.006   |
| alpha-D-Mannose                         | 1.847                       | 0.009   |
| Gluconic acid                           | 1.816                       | 0.007   |
| Phenyllactate                           | 1.794                       | 0.017   |
| Dihydrouracil                           | 1.636                       | 0.015   |
| Phosphorylcholine                       | 1.046                       | 0.023   |



Table S2 10 metabolites physiological concentration in human and product information

| Metabolites                | Dose concentration <sup>1</sup> | Identifier | Source          | Ref. | Concentration used in Fig.2B |
|----------------------------|---------------------------------|------------|-----------------|------|------------------------------|
| Hippuric acid              | 16.74 ± 11.16 µM                | S5618      | Selleck         | [1]  | 25 µM                        |
| N2-gamma-Glutamylglutamine | 117.00 µM                       | L302213    | Aladdin         | [2]  | 100 µM                       |
| 9-Riburonosyl adenine      | 73 µM                           | BCP20755   | Biochem partner | [3]  | 75 µM                        |
| Taurine                    | 93.0 ± 35.7 µM                  | T8691      | Sigma           | [4]  | 100 µM                       |
| N-Acetylglutamic acid      | 200 ± 30 nM                     | S6245      | Selleck         | [5]  | 250 nM                       |
| alpha-D-Mannose            | 64.0 ± 12.0 µM                  | HY-N7389B  | MCE             | [6]  | 50 µM                        |
| Gluconic acid              | 3.295 ± 0.534 µM                | S3595      | Selleck         | [7]  | 2.5 µM                       |
| Phenyllactate              | 43.2 ± 14.3 ng/mL               | P113801    | Aladdin         | [8]  | 50 ng/ml                     |
| Dihydrouracil              | 310 nM                          | E0750      | Selleck         | [9]  | 300 nM                       |
| Phosphorylcholine          | 2.2 ± 1.0 µM                    | HY-B2233B  | MCE             | [10] | 2.5 µM                       |

1. Data was obtained from The Human Metabolome Database.

Table S3. Antibodies information

| Antibodies                                           | Brand       | Catalog No. | Dilution and dosage            |
|------------------------------------------------------|-------------|-------------|--------------------------------|
| FITC anti-human CD45                                 | Biologend   | 982316      | 1:100 for Flow                 |
| APC anti-human EpCAM                                 | Biologend   | 324207      | 1:100 for Flow                 |
| PE/Cyanine7 anti-human CD11b                         | Biologend   | 982608      | 1:100 for Flow                 |
| PerCP/Cyanine5.5 anti-mouse CD68 Antibody            | Biologend   | 137009      | 1:100 for Flow                 |
| PE anti-human CD163                                  | Biologend   | 333605      | 1:100 for Flow                 |
| Brilliant Violet 605 anti-human CD86 Antibody        | Biologend   | 374213      | 1:100 for Flow                 |
| Lats1                                                | CST         | 3477S       | 1:1000 for WB                  |
| p-Lats1                                              | CST         | 9157        | 1:1000 for WB                  |
| YAP1                                                 | CST         | 14074S      | 1:1000 for WB                  |
| p-YAP1                                               | CST         | 13008       | 1:1000 for WB                  |
| TauT                                                 | Abclonal    | A14783      | 1:1000 for WB<br>1:200 for IHC |
| SCD1                                                 | Abclonal    | A16429      | 1:1000 for WB<br>1:200 for IHC |
| CD163                                                | abcam       | ab182422    | 1:1000 for WB<br>1:200 for IHC |
| LXR $\alpha$                                         | ProteinTech | 14351-1-AP  | 1:1000 for WB<br>1:100 for IF  |
| FUS                                                  | ProteinTech | 11570-1-AP  | 1:1000 for WB                  |
| $\beta$ -actin                                       | ProteinTech | 66009-1-Ig  | 1:5000 for WB                  |
| Histone-H3                                           | ProteinTech | 17168-1-AP  | 1:5000 for WB                  |
| Non-phospho (Active) YAP (Ser127) (E6U8Z) Rabbit mAb | CST         | 29495       | 1:1000 for WB                  |
| Tead4                                                | Abcam       | ab58310     | 1:100 for ChIP                 |
| Flag                                                 | Sigma       | F1804       | 1:100 for ChIP                 |
| Normal rabbit IgG                                    | CST         | 2729S       | 1:200 for ChIP                 |
| 4-HNE                                                | abcam       | 48506       | 1:200 for IHC                  |
| Ki67                                                 | abcam       | ab15580     | 1:200 for IHC                  |
| Donkey $\alpha$ -rabbit Alexa Flour 594              | Invitrogen  | A21207      | 1:400 for IF                   |
| HRP-conjugated Affinipure Goat Anti-Mouse IgG(H+L)   | ProteinTech | SA00001-1   | 1:5000 for WB                  |

|                                                     |             |           |               |
|-----------------------------------------------------|-------------|-----------|---------------|
| HRP-conjugated Affinipure Goat Anti-Rabbit IgG(H+L) | ProteinTech | SA00001-2 | 1:5000 for WB |
|-----------------------------------------------------|-------------|-----------|---------------|

Table S4 Clinical information of prostate cancer patient

|                                                     | case # | Age | Gleason Score | TNM     |
|-----------------------------------------------------|--------|-----|---------------|---------|
| Used for tested taurine content and TauT expression | 1      | 63  | 4+3=7         | T2cN1M0 |
|                                                     | 2      | 63  | 4+5=9         | T2cN0M1 |
|                                                     | 3      | 72  | 4+3=7         | T2cN0M0 |
|                                                     | 4      | 76  | 3+4=7         | T2cN0M1 |
|                                                     | 5      | 71  | 4+5=9         | T3bN0M1 |
|                                                     | 6      | 70  | 4+4=8         | T2cN0M0 |
| Used for checked polarization state of macrophages  | 7      | 74  | 3+4=7         | T3aN1M1 |
|                                                     | 8      | 74  | 3+4=7         | T2bN0M1 |
|                                                     | 9      | 74  | 5+4=9         | T2cN0M0 |

Table S5 Primers used in RT-PCR

| Gene      | Primer-F                | Primer-R                |
|-----------|-------------------------|-------------------------|
| CD68      | GGAAATGCCACGGTTCATCCA   | TGGGGTTCAGTACAGAGATGC   |
| CD163     | CCAGAAGGAACTTGTAGCCACAG | CAGGCACCAAGCGTTTTGAGCT  |
| Arg1      | GTGGAAACTTGCATGGACAAC   | AATCCTGGCACATCGGGAATC   |
| IL10      | TCAAGGCGCATGTGAACTCC    | GATGTCAAACCTCACTCATGGCT |
| Nos2      | TCTATGTTTGCGGGGATGTG    | GTCCTTCTTCGCTCGTAAG     |
| Lats1     | CACTGGCTTCAGATGGACACAC  | GGCTTCAGTCTGTCTCCACATC  |
| Actb      | CACCATTGGCAATGAGCGGTTC  | AGGTCTTTGCGGATGTCCACGT  |
| Scd       | CCTGGTTTCACTTGGAGCTGTG  | TGTGGTGAAGTTGATGTGCCAGC |
| Fus       | CAGACAGGGAAACTGGCAAGCT  | GGCGAGTAGCAAATGAGACCTTG |
| miR-181A1 | TTCAACGCTGTCGGTGA       | GAACATGTCTGCGTATCTC     |
| miR-181A2 | AACATTCAACGCTGTCCGGTG   | GAACATGTCTGCGTATCTC     |
| Slc6a6    | TGATGTGGCTGAGTCAGGTCCT  | CTGGCTATCCAGTCCAAGCAAG  |

Table S6 Primers used for ChIP-qPCR

| Primer ID             | Primer-F              | Primer-R              |
|-----------------------|-----------------------|-----------------------|
| LXR $\alpha$ -SCD BS1 | ATGTGGATCACCTGAGGTCAG | TCAAGAAATTCTCCTGCCTCA |
| LXR $\alpha$ -SCD BS2 | CAGGGACAGATCAGTAGGGTC | AATAACTGCCCATGGTCACA  |

|                         |                           |                               |
|-------------------------|---------------------------|-------------------------------|
| LXR $\alpha$ -SCD BS3   | CCAAGCCCTTTCGCCTGCTGC     | GATGTTTTGGAGATTCTTCAGA        |
| LXR $\alpha$ -181A1 BS1 | ATGCCTTTTAATTATTTGTAA     | GTATAATAGGGATGTTGTGAT         |
| LXR $\alpha$ -181A1 BS2 | CATAAAAATGCATAAAAATATA    | TCCAAACTCACCGACAGCGTT         |
| LXR $\alpha$ -FUS BS1   | GTTTCACCATGTTGGCCAG       | ATAAAGCTGACCGGGTGCGGT         |
| LXR $\alpha$ -FUS BS2   | CGAAATCCCTGCTGTCTTTCA     | CTGCGCCCTGAGGTTGACTTCG        |
| Neg-CTRL                | GGCCGGAGCTTCTCGAACTA      | CTTGCAGCCTCAGCCCTTC           |
| TEAD4-ARG1 BS1          | GCATACAAAGAACTTTCAGGATGTG | ATGGAGATTTGCTAACTTTC          |
| TEAD4-ARG1 BS2          | AGCCTATGTTGGCAACGGGT      | TACCATGTGTCCGATGCAGTTC        |
| TEAD4-CD163 BS1         | GTACGGGTAGGGAGGCAGTA      | TCAACAAAGGCACCCCAGTT          |
| TEAD4-CD163 BS2         | CTTTTTGAGTTGACTCCGCCT     | TAAATCTTCTTGTATTATCCCTAGAAATG |
| TEAD4-SLC6A6 BS1        | GGCGTCTGAGGAGTTTTTGC      | AGAGGAGTGACTGGGTCTCC          |

Supplementary Reference cited in Table S2:

1. Duranton, F., et al., *Normal and pathologic concentrations of uremic toxins*. J Am Soc Nephrol, 2012. **23**(7): p. 1258-70.
2. Hammond, J.W., et al., *gamma-Glutamylglutamine identified in plasma and cerebrospinal fluid from hyperammonaemic patients*. Clin Chim Acta, 1990. **194**(2-3): p. 173-83.
3. Uri, A., et al., *A new class of compounds, peptide derivatives of adenosine 5'-carboxylic acid, includes inhibitors of ATP receptor-mediated responses*. Bioorg Med Chem, 1994. **2**(10): p. 1099-105.
4. Trabado, S., et al., *The human plasma-metabolome: Reference values in 800 French healthy volunteers; impact of cholesterol, gender and age*. PLoS One, 2017. **12**(3): p. e0173615.
5. Yoshimi, N., et al., *Blood metabolomics analysis identifies abnormalities in the citric acid cycle, urea cycle, and amino acid metabolism in bipolar disorder*. BBA Clin, 2016. **5**: p. 151-8.
6. C. Lentner ; West Cadwell, N.J., *Geigy scientific tables*. 8th Rev edition ed. Medical education Div. 1981–1992, Basel, Switzerland: Ciba-Geigy Corp.
7. Koike, S., et al., *A snapshot of plasma metabolites in first-episode schizophrenia: a capillary electrophoresis time-of-flight mass spectrometry study*. Transl Psychiatry, 2014. **4**(4): p. e379.
8. Oezguen, N., et al., *Serum 3-phenyllactic acid level is reduced in benign multiple*

*sclerosis and is associated with effector B cell ratios.* Mult Scler Relat Disord, 2022. **68**:

p. 104239.

9. Jiang, H., et al., *Measurement of endogenous uracil and dihydrouracil in plasma and urine of normal subjects by liquid chromatography-tandem mass spectrometry.* J Chromatogr B Analyt Technol Biomed Life Sci, 2002. **769**(1): p. 169-76.
10. Ilcol, Y.O., et al., *Choline status in newborns, infants, children, breast-feeding women, breast-fed infants and human breast milk.* J Nutr Biochem, 2005. **16**(8): p. 489-99.
